# Supplementary material for: Measurement Invariance of the WHO-5 Well-Being Index: Evidence from 15 European Countries
Source: MDPI journal article supplement (doi:10.3390/ijerph19169798), 2022-08-09
Supplement: s1 [file s1]

# Supplementary Materials:

**Table S1.** WHO-5 Well-being Index, Table CFA model fit and reliability, by country ( $N = 79,104$ , 15 countries)

| Country             | <i>n</i> | CFI   | TLI   | RMSEA | SRMR  | Min.<br>loading | Max.<br>loading | Internal<br>consistency |
|---------------------|----------|-------|-------|-------|-------|-----------------|-----------------|-------------------------|
| Overall             | 79,104   | 0.983 | 0.965 | 0.084 | 0.020 | 0.70            | 0.77            | 0.860                   |
| Austria             | 4,129    | 0.977 | 0.065 | 0.091 | 0.023 | 0.64            | 0.76            | 0.835                   |
| Armenia             | 4,717    | 0.988 | 0.971 | 0.058 | 0.017 | 0.60            | 0.73            | 0.800                   |
| Czechia             | 11,564   | 0.963 | 0.925 | 0.165 | 0.028 | 0.76            | 0.89            | 0.918                   |
| Georgia             | 4,242    | 0.968 | 0.935 | 0.142 | 0.029 | 0.73            | 0.88            | 0.903                   |
| Ireland             | 3,833    | 0.973 | 0.946 | 0.114 | 0.024 | 0.70            | 0.82            | 0.872                   |
| Kazakhstan          | 4,868    | 0.991 | 0.984 | 0.041 | 0.013 | 0.50            | 0.72            | 0.752                   |
| Lithuania           | 3,797    | 0.982 | 0.963 | 0.081 | 0.020 | 0.68            | 0.77            | 0.835                   |
| Republic of Moldova | 4,686    | 0.981 | 0.963 | 0.069 | 0.021 | 0.60            | 0.70            | 0.785                   |
| Poland              | 5,224    | 0.979 | 0.958 | 0.081 | 0.021 | 0.65            | 0.75            | 0.816                   |
| Romania             | 4,567    | 0.979 | 0.959 | 0.080 | 0.022 | 0.63            | 0.73            | 0.812                   |
| Russian Federation  | 4,281    | 0.976 | 0.952 | 0.096 | 0.023 | 0.66            | 0.80            | 0.844                   |
| Scotland            | 5,021    | 0.985 | 0.970 | 0.080 | 0.017 | 0.71            | 0.79            | 0.861                   |
| Slovenia            | 5,667    | 0.980 | 0.961 | 0.092 | 0.022 | 0.63            | 0.82            | 0.854                   |
| Turkey              | 5,848    | 0.967 | 0.935 | 0.105 | 0.026 | 0.53            | 0.77            | 0.817                   |
| Ukraine             | 6,660    | 0.981 | 0.963 | 0.104 | 0.020 | 0.74            | 0.86            | 0.898                   |

CFA = confirmatory factor analysis; CFI = comparative fit index; TLI = Tucker Lewis Index;

RMSEA = root mean square error of approximation; SRMS = standardised root mean square residual

**Table S2.** WHO-4 Well-being Index, Table CFA model fit and reliability, by country ( $N = 74,071$ , 15 countries)

| Country             | <i>n</i> | CFI   | TLI   | RMSEA | SRMR  | Min.<br>loading | Max.<br>loading | Internal<br>consistency |
|---------------------|----------|-------|-------|-------|-------|-----------------|-----------------|-------------------------|
| Overall             | 74,071   | 0.998 | 0.993 | 0.041 | 0.009 | 0.71            | 0.76            | 0.860                   |
| Austria             | 3,988    | 0.996 | 0.988 | 0.048 | 0.011 | 0.67            | 0.73            | 0.799                   |
| Armenia             | 4,374    | 0.991 | 0.971 | 0.066 | 0.017 | 0.59            | 0.71            | 0.752                   |
| Czechia             | 9,813    | 0.994 | 0.983 | 0.083 | 0.012 | 0.81            | 0.86            | 0.897                   |
| Georgia             | 3,856    | 0.967 | 0.902 | 0.190 | 0.033 | 0.75            | 0.89            | 0.881                   |
| Ireland             | 3,636    | 0.999 | 0.997 | 0.026 | 0.006 | 0.70            | 0.78            | 0.838                   |
| Kazakhstan          | 4,354    | 0.998 | 0.994 | 0.025 | 0.008 | 0.52            | 0.68            | 0.701                   |
| Lithuania           | 3,710    | 0.998 | 0.995 | 0.030 | 0.008 | 0.68            | 0.71            | 0.796                   |
| Republic of Moldova | 4,476    | 0.994 | 0.981 | 0.052 | 0.014 | 0.63            | 0.68            | 0.743                   |
| Poland              | 5,127    | 0.999 | 0.996 | 0.027 | 0.007 | 0.66            | 0.72            | 0.777                   |
| Romania             | 4,392    | 0.995 | 0.986 | 0.048 | 0.012 | 0.63            | 0.73            | 0.774                   |
| Russian Federation  | 4,104    | 1.000 | 0.999 | 0.014 | 0.005 | 0.63            | 0.80            | 0.805                   |
| Scotland            | 4,852    | 0.998 | 0.995 | 0.035 | 0.008 | 0.71            | 0.74            | 0.826                   |
| Slovenia            | 5,540    | 0.997 | 0.992 | 0.044 | 0.010 | 0.66            | 0.78            | 0.818                   |
| Turkey              | 5,671    | 0.998 | 0.994 | 0.034 | 0.009 | 0.54            | 0.78            | 0.774                   |
| Ukraine             | 6,178    | 0.995 | 0.985 | 0.069 | 0.012 | 0.77            | 0.84            | 0.870                   |

CFA = confirmatory factor analysis; CFI = comparative fit index; TLI = Tucker Lewis Index;

RMSEA = root mean square error of approximation; SRMS = standardised root mean square residual

**Table S3.** Convergent validity: correlation coefficients using aggregated data (WHO-5) ( $N = 74,071$ )

|                             | 1      | 2      | 3      | 4 |
|-----------------------------|--------|--------|--------|---|
| 1. WHO-5 Well-being         | 1      |        |        |   |
| 2. Psychosomatic complaints | -0.455 | 1      |        |   |
| 3. Life satisfaction        | 0.446  | -0.376 | 1      |   |
| 4. Self-rated health        | -0.341 | 0.334  | -0.371 | 1 |

All correlations are significant at  $p < 0.05$ .

**Table S4.** Convergent validity by gender: correlation coefficients using aggregated data (WHO-5) ( $N = 74,071$ )

|                                     | 1 (boys) | 2 (boys) | 3 (boys) | 4 (boys) |
|-------------------------------------|----------|----------|----------|----------|
| 1. WHO-5 Well-being (girls)         | 1        | -0.383   | 0.398    | -0.298   |
| 2. Psychosomatic complaints (girls) | -0.496   | 1        | -0.319   | 0.276    |
| 3. Life satisfaction (girls)        | 0.483    | -0.417   | 1        | -0.349   |
| 4. Self-rated health (girls)        | -0.369   | 0.382    | -0.386   | 1        |
